# Supplementary material for: Comparison of the pathogen species-specific immune response in udder derived cell types and their models
Source: PubMed Central journal article supplement (PMC4736154; doi:10.1186/s13567-016-0307-3), 2016-02-01

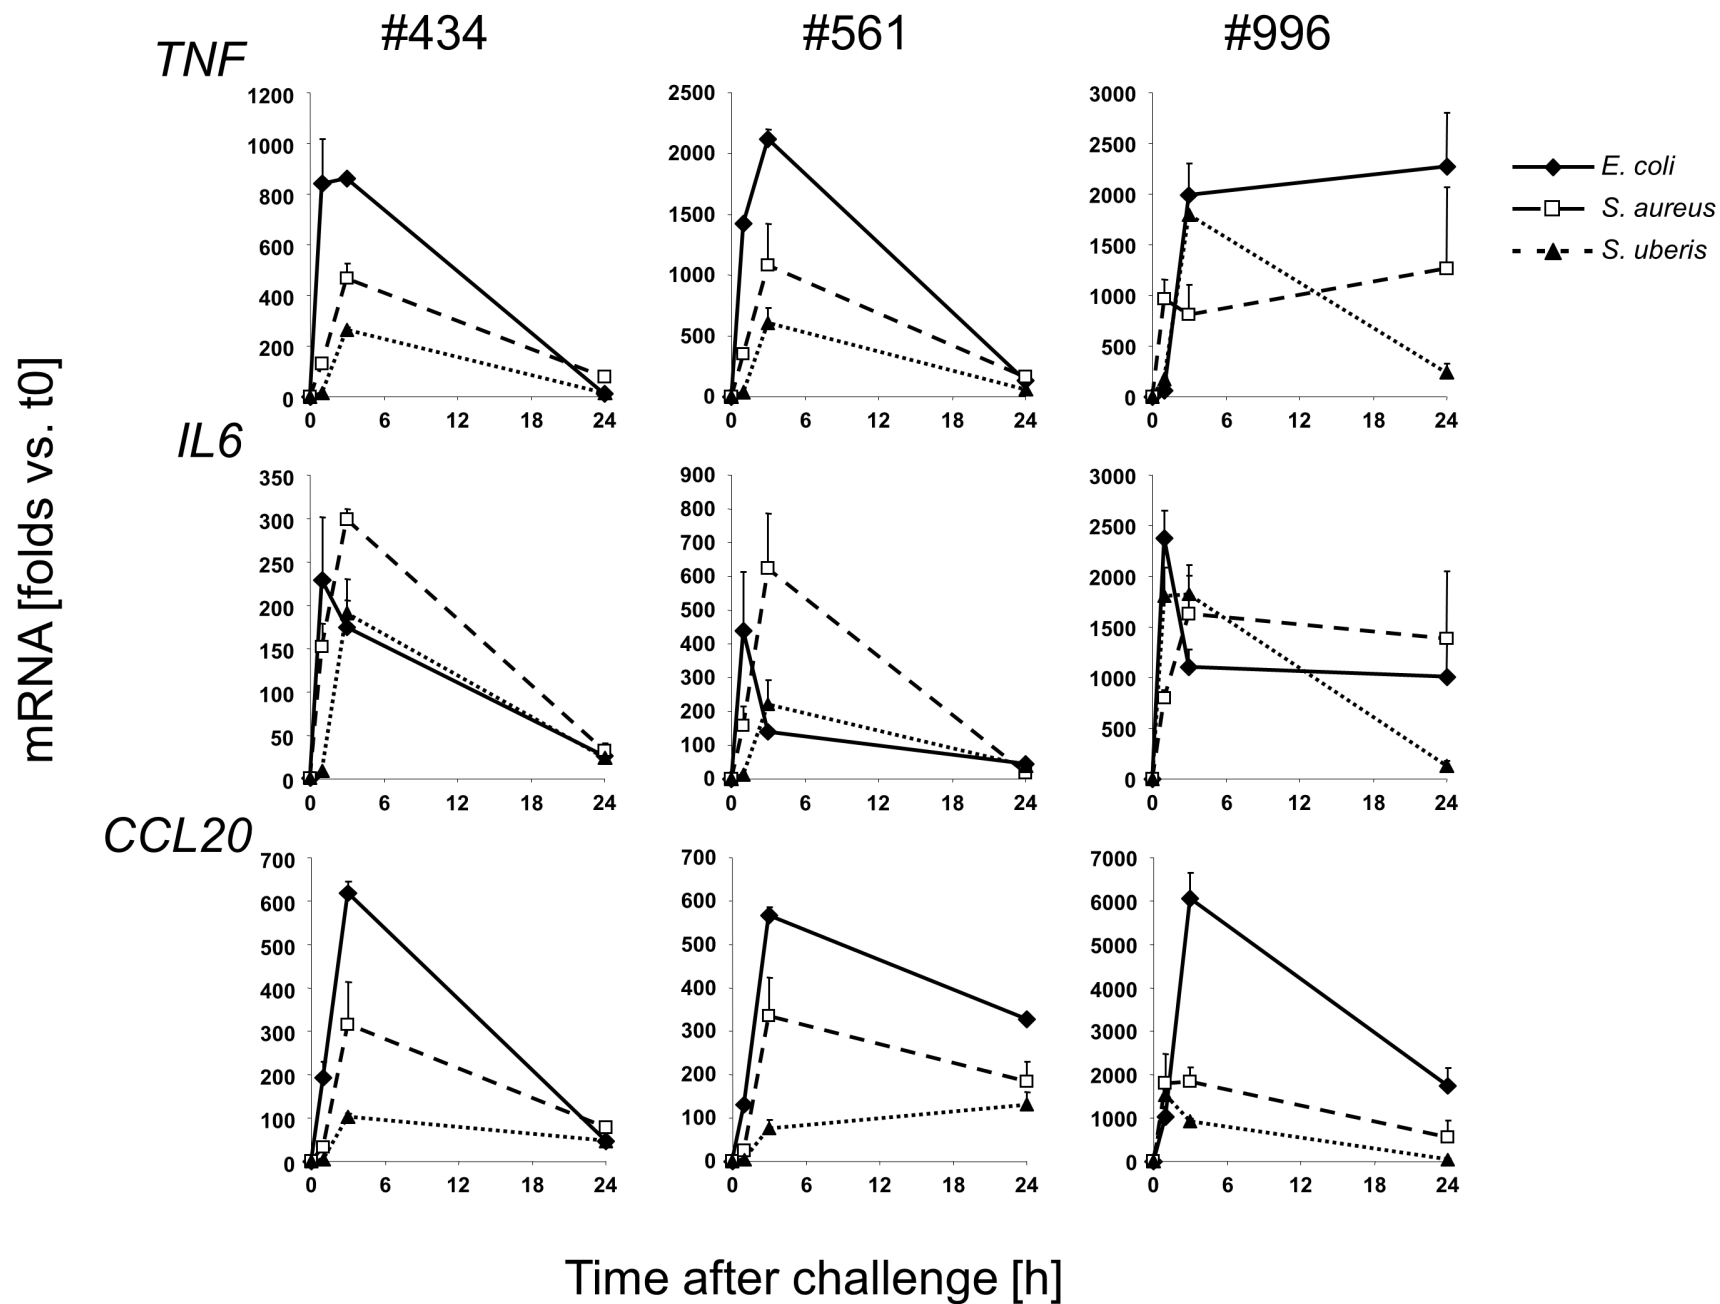

Supplement: 13567_2016_307_MOESM1_ESM.pdf [file 13567_2016_307_MOESM1_ESM.pdf]
